# Supplementary material for: Improving Medical Education through Student Feedback: Key Factors Driving Response Rates in Online Student Evaluations of Teaching - An Extended Technology Acceptance Model
Source: Research Square preprint supplement (doi:10.21203/rs.3.rs-8165782/v1), 2025-12-22
Supplement: Supplementary file 1 [file 01857fde661a2a09c4a557cc.docx]

# Supplementary Material

| **Table 5** Overview of the custom questionnaire used in this study, including an indication of which items were included in the EFA and CFA. | | | | | |
| --- | --- | --- | --- | --- | --- |
| **Factor** | **Item #** | **Item Text** | **EFA** | | **CFA** |
| PU | PU1 | The evaluation is an important tool for improving teaching quality. | ✓ |  | |
|  | PU2 | I consider the evaluation a natural component of improving teaching. | ✓ |  | |
|  | PU3 | The overview of all my current, past, and upcoming evaluations is useful. | ✓ | ✓ | |
|  | PU4 | The evaluation questionnaires cover the most important aspects of teaching evaluation. | ✓ |  | |
|  | PU5 | Group results are available in a timely manner. | ✓ |  | |
|  | PU6 | Cohort results are available in a timely manner. |  |  | |
|  | PU7 | I value that only my group’s evaluation results are visible in EVABOX. | ✓ | ✓ | |
|  | PU8 | It is useful that group results are linked to named instructors. | ✓ | ✓ | |
|  | PU9 | The group results are meaningful. | ✓ | ✓ | |
|  | PU10 | The cohort results are meaningful. |  |  | |
|  | PU11 | I perceive that evaluation results lead to concrete improvements in teaching. | ✓ |  | |
|  | PU12 | It is important to me to be able to evaluate all courses. | ✓ |  | |
| PEOU | PEOU1 | My evaluations are easy to find. | ✓ | ✓ | |
|  | PEOU2 | EVABOX is easy to use. | ✓ | ✓ | |
|  | PEOU3 | The displayed information (for example instructor names) is accurate and updated promptly. | ✓ | ✓ | |
|  | PEOU4 | The omission of invitation emails for individual course evaluations is user-friendly. | ✓ |  | |
|  | PEOU5 | The group results are easy to find. | ✓ |  | |
|  | PEOU6 | The cohort results are easy to find. |  |  | |
|  | PEOU7 | Measures derived from evaluation results are easy to find. | ✓ |  | |
|  | PEOU8 | I am more likely to complete evaluations if the instructor provides time in class. | ✓ |  | |
|  | PEOU9 | I am more likely to complete evaluations if the instructor merely reminds us. | ✓ |  | |
|  | PEOU10 | I am more likely to complete evaluations if the instructor says nothing about them. | ✓ |  | |
| PW | PW1 | The number of evaluations I have to complete is… | ✓ | ✓ | |
|  | PW2 | Having to evaluate each course individually is burdensome. | ✓ | ✓ | |
|  | PW3 | The length of the evaluation questionnaires is… | ✓ | ✓ | |
|  | PW4 | The effort required to complete evaluations is… | ✓ | ✓ | |
| IM | IM1 | I am motivated to evaluate because it allows me to view group results. | ✓ |  | |
|  | IM2 | I am motivated to evaluate because it helps improve teaching for future students. | ✓ |  | |
|  | IM3 | I am motivated to evaluate when repeated poor ratings lead to concrete improvement measures. | ✓ | ✓ | |
|  | IM4 | I am motivated to evaluate because the results lead to curricular improvements. | ✓ | ✓ | |
|  | IM5 | I am motivated to evaluate because it allows me to acknowledge good teaching. | ✓ |  | |
|  | IM6 | I am motivated to participate in evaluations when I know that concrete measures will be implemented for teaching that has been repeatedly rated criticall. | ✓ | ✓ | |
| EM | EM1 | I am motivated to evaluate if it increases my chances of joining my preferred study group. | ✓ | ✓ | |
|  | EM2 | I am motivated to evaluate if it increases my chances of getting my preferred Erasmus placement. | ✓ | ✓ | |
|  | EM3 | I am motivated to evaluate if it increases my chances of getting my preferred tutorial group. | ✓ | ✓ | |
|  | EM4 | I am motivated to evaluate when my peers also evaluate frequently. | ✓ |  | |
| BI | BI1 | I intend to use EVABOX for evaluations. | ✓ | ✓ | |
|  | BI2 | I plan to participate in future evaluations in EVABOX. | ✓ | ✓ | |
|  | BI3 | I intend to evaluate many courses in EVABOX. | ✓ | ✓ | |
|  | BI4 | I want to view many evaluation results in EVABOX. | ✓ |  | |
|  | BI5 | I plan to inform myself about actions derived from evaluations. | ✓ |  | |
| Original items were in German; English translations are provided for publication clarity. Items were measured on a five-point Likert scale ranging from “completely agree” (1) to “completely disagree” (5). PW1 and PW4 were measured using bipolar scales ranging from “too high” (1) to “too low” (5), and PW3 using a bipolar scale ranging from “too long” (1) to “too short” (5). | | | | | |

| **Table 6** EFA factor loadings | | | | | | | | | | | |
| --- | --- | --- | --- | --- | --- | --- | --- | --- | --- | --- | --- |
| **Item** | **MR1** | **MR2** | **MR3** | **MR4** | **MR5** | **MR6** | **MR7** | **MR8** | **MR9** | **MR10** | **MR11** |
| PU1 |  |  |  |  |  |  |  |  |  |  | .648 |
| PU2 |  |  |  |  |  |  |  |  |  |  | .679 |
| PU3 |  |  |  |  |  | .313 |  |  |  | .402 |  |
| PU4 |  |  |  |  |  |  |  |  |  | .456 |  |
| PU5 |  |  |  |  | .791 |  |  |  |  |  |  |
| PU7 |  |  |  |  | .459 | .541 |  |  |  |  |  |
| PU8 |  |  |  |  | .473 | .363 |  |  |  |  |  |
| PU9 |  |  |  |  |  | .315 |  |  |  |  |  |
| PU11 |  |  |  |  |  |  | .659 |  |  |  |  |
| PU12 |  |  |  |  |  |  |  |  |  |  | .365 |
| PEOU1 |  |  |  |  |  |  |  |  |  | .516 |  |
| PEOU2 |  |  |  |  |  |  |  |  |  | .655 |  |
| PEOU3 |  |  |  |  |  |  |  |  |  | .398 |  |
| PEOU4 |  |  |  |  |  |  |  |  |  |  |  |
| PEOU5 |  |  |  |  | .836 |  |  |  |  |  |  |
| PEOU7 |  |  |  |  |  |  | .912 |  |  |  |  |
| PEOU8 |  |  |  | .664 |  |  |  |  |  |  |  |
| PEOU9 |  |  |  | .996 |  |  |  |  |  |  |  |
| PEOU10 |  |  |  | .469 |  |  |  |  | –.305 |  |  |
| BI1 | .922 |  |  |  |  |  |  |  |  |  |  |
| BI2 | .907 |  |  |  |  |  |  |  |  |  |  |
| BI3 | .902 |  |  |  |  |  |  |  |  |  |  |
| BI4 |  |  |  |  |  | .725 |  |  |  |  |  |
| BI5 |  |  |  |  |  | .541 |  |  |  |  |  |
| PW1 |  |  | .636 |  |  |  |  |  |  |  |  |
| PW2 |  |  | .48 |  |  |  |  |  |  |  |  |
| PW3 |  |  | .76 |  |  |  |  |  |  |  |  |
| PW4 |  |  | .905 |  |  |  |  |  |  |  |  |
| IM1 |  |  |  |  |  | .603 |  |  |  |  |  |
| IM2 |  |  |  |  |  |  |  |  | .475 |  |  |
| IM3 |  | .94 |  |  |  |  |  |  |  |  |  |
| IM4 |  | .856 |  |  |  |  |  |  |  |  |  |
| IM5 |  |  |  |  |  |  |  |  | .613 |  |  |
| IM6 |  | .983 |  |  |  |  |  |  |  |  |  |
| EM1 | .534 |  |  |  |  |  |  | .406 |  |  |  |
| EM2 |  |  |  |  |  |  |  | .808 |  |  |  |
| EM3 |  |  |  |  |  |  |  | .912 |  |  |  |
| EM4 |  |  |  |  |  |  |  |  |  |  |  |
| Only factor loadings ≥ .3 are depicted; MR: minimum residual factor | | | | | | | | | | | |
